# MIND TO MIND

*Creative writing that explores the abstract side  
of our profession and our lives*

Carol Wiley Cassella, M.D., Editor

## Secrets of a Resident

Janine Whitson-West, D.O.

I  
If I were made of sticks and straw  
You'd think that I was weak  
And I might not keep the promises  
That I was meant to keep

If I were made of sticks and straw  
My cracks would surely show  
My fragilities laid open then  
Brought down by one more blow

If I were made of sticks and straw  
No nerves or veins or blood  
This heavy load would crack the seams  
With all lost in the flood

If I were made of sticks and straw  
No lessons left to learn  
I'd tempt the flame to feel again  
I just might let them burn

---

From Johns Hopkins Hospital, Baltimore, Maryland. [jwhitso3@jhmi.edu](mailto:jwhitso3@jhmi.edu)

Accepted for publication May 24, 2013.

Copyright © 2013, the American Society of Anesthesiologists, Inc. Lippincott Williams & Wilkins. Anesthesiology 2014; 120:233
